# Supplementary material for: Emission amplification by sumanene nanocrystals in an onigiri-type organic–organic assembly
Source: Royal Society of Chemistry journal article supplement (doi:10.1039/c2cc33643j), 2012-01-01
Supplement: c2cc33643j.pdf [file c2cc33643j.pdf]

## Supplementary Information

# Emission Amplification by Sumanene Nanocrystals in an Onigiri-Type Organic–Organic Assembly

Yuki Morita,<sup>a</sup> Satoru Nakao,<sup>a</sup> Setsiri Haesuwannakij,<sup>b</sup> Shuhei Higashibayashi,<sup>ab</sup> and  
Hidehiro Sakurai<sup>\*ab</sup>

<sup>a</sup>Research Center for Molecular Scale Nanoscience, Institute for Molecular Science,  
Myodaiji, Okazaki, 444-8787, Japan.

<sup>b</sup>Department of Functional Molecular Science, School of Physical Sciences, The  
Graduate University for Advanced Studies, Myodaiji, Okazaki, 444-8787, Japan  
hsakurai@ims.ac.jp

### Supporting information

|                                                |      |
|------------------------------------------------|------|
| General remark                                 | S2   |
| Materials                                      | S2   |
| Experimental details                           |      |
| Fabrication of nanocrystalline dispersions     | S2-3 |
| Scanning electron microscopy                   | S3-4 |
| Transmission electron microscopy               | S-4  |
| Powder X-ray diffraction                       | S4-7 |
| UV-visible absorption and fluorescence spectra | S7-9 |
| Reference                                      | S-9  |

### General remark

UV-visible absorption spectra were recorded on a JASCO V-670 spectrometer. Fluorescence spectra were recorded on a JASCO FP6500 spectrometer.  $^1\text{H}$  and  $^{13}\text{C}$  NMR were measured on JEOL JNM-LA500.  $\text{CDCl}_3$  was used as a solvent and the residual solvent peak was used as an internal standard ( $^1\text{H}$  NMR: 7.26 ppm,  $^{13}\text{C}$  NMR: 77.0 ppm). Gel permeation chromatography (GPC) was performed on JAIGEL 1H and 2H using a JAI Recycling Preparative HPLC LC-908W. Transmission electron microscopy (TEM) images were obtained using a JEOL JEM-2100F microscope. Scanning electron microscopy (SEM) images were obtained using a JEOL JSM-6700F microscope. Powder X-ray diffraction (XRD) patterns were recorded on a Rigaku RINT Ultima III with  $\text{CuK}\alpha$  X-ray source and a reflection free sample holder.

### Materials

Sumanene (**1**) was synthesized by the reported method.<sup>1</sup> Sumanenetrione (**2**) was synthesized by following the preparation of trimethylsumanenetrione from trimethylsumanene.<sup>2</sup>

To a solution of **1** (1.2 mg, 4.9  $\mu\text{mol}$ ) in DMF (5 ml) at  $-60\text{ }^\circ\text{C}$  under argon atmosphere was added a solution of  $\text{NaN}(\text{SiMe}_3)_2$  (1.4 M in THF, 30  $\mu\text{l}$ , 42  $\mu\text{mol}$ ). After stirring for 2 h, the solution was bubbled with oxygen gas for 15 min at  $-60\text{ }^\circ\text{C}$ . The reaction was quenched by pouring the reaction mixture into silica gel cooled by liquid nitrogen. The silica gel was filtered and washed by ethyl acetate to give a crude product. The crude products of four batches were combined, and purified by GPC to give **2** (1.3 mg, 4.2  $\mu\text{mol}$ , 21% yield) as an orange solid. The spectral data were identical to those reported.<sup>3</sup>

**2**:  $^1\text{H}$  NMR ( $\text{CDCl}_3$ , 500 MHz)  $\delta$ : 7.40 (s, 6H) ppm.  $^{13}\text{C}$  NMR ( $\text{CDCl}_3$ , 125 MHz)  $\delta$ : 188.2, 149.7, 143.6, 126.6 ppm.

### Experimental details

#### Fabrication of nanocrystalline dispersions.

##### 1. Fabrication of **RS1**.

A THF (5 ml) solution of **1** (1.2 mg, 4.9  $\mu\text{mol}$ ) was prepared, and 100  $\mu\text{l}$  of the solution was injected rapidly into vigorous stirred water (10 ml) using a microsyringe at room temperature. Stirrings were continued for 5 seconds after injection, and colorless and clear dispersion was formed.

##### 2. Fabrication of **RS2**.

A THF (5 ml) solution of **2** (1.5 mg, 4.9  $\mu\text{mol}$ ) was prepared, and 100  $\mu\text{l}$  of the solution was injected rapidly into vigorous stirred water (10 ml) using a microsyringe at room temperature. Stirrings were continued for 5 seconds after injection, and colorless and clear dispersion was formed.

### 3. Fabrication of **RS2<sub>SDS</sub>**.

A THF (5 ml) solution of **2** (1.5 mg, 4.9  $\mu\text{mol}$ ) and an aqueous solution (50 ml) of sodium dodecylsulfate (15 mg, 52  $\mu\text{mol}$ ) were prepared, and 100  $\mu\text{l}$  of the THF solution of **2** was injected rapidly into the vigorous stirred SDS aqueous solution (10 ml) using a microsyringe at room temperature. Stirrings were continued for 5 seconds after injection, and colorless and clear dispersion was formed.

### 4. Fabrication of **AS1-2**.

A THF (5 ml) solution of **1** (1.2 mg, 4.9  $\mu\text{mol}$ ) and a THF (5 ml) solution of **2** (1.5 mg, 4.9  $\mu\text{mol}$ ) were prepared. 100  $\mu\text{l}$  of the solution of **1** was injected rapidly into vigorous stirred water (10 ml) using a microsyringe at room temperature, and stirrings were continued for 5 seconds after injection. 100  $\mu\text{l}$  of the solution of **2** was injected into that stirred aqueous sample by using a microsyringe, successively. Stirrings were continued for 30 seconds after injection, and colorless and clear dispersion was formed.

### 5. Fabrication of **AS2-1**.

A THF (5 ml) solution of **1** (1.2 mg, 4.9  $\mu\text{mol}$ ) and a THF (5 ml) solution of **2** (1.5 mg, 4.9  $\mu\text{mol}$ ) were prepared. 100  $\mu\text{l}$  of the solution of **2** was injected rapidly into vigorous stirred water (10 ml) using a microsyringe at room temperature, and stirrings were continued for 5 seconds after injection. 100  $\mu\text{l}$  of the solution of **1** was injected into that stirred aqueous sample by using a microsyringe, successively. Stirrings were continued for 30 seconds after injection, and colorless and clear dispersion was formed.

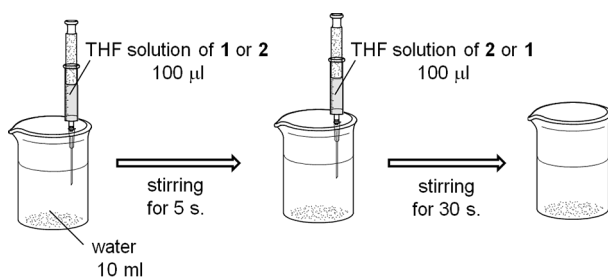

Figure S1. A schematic illustration of the stepwise reprecipitation method.

### Scanning electron microscopy (SEM)

Samples for SEM observation were prepared as follows: the nanocrystalline aqueous dispersions (**RS1**, **RS2**, **RS2<sub>SDS</sub>**, **AS1-2**, and **AS2-1**) were filtered on milipore filters (OMNIPORE membrane filter with pore size of 0.1  $\mu\text{m}$ ) and dried *in vacuo*. Filtered nanocrystalline powders were transferred on carbon seal for observation. SEM images were observed at 5.0 kV. Figure S1 shows a SEM image of **RS2<sub>SDS</sub>**.

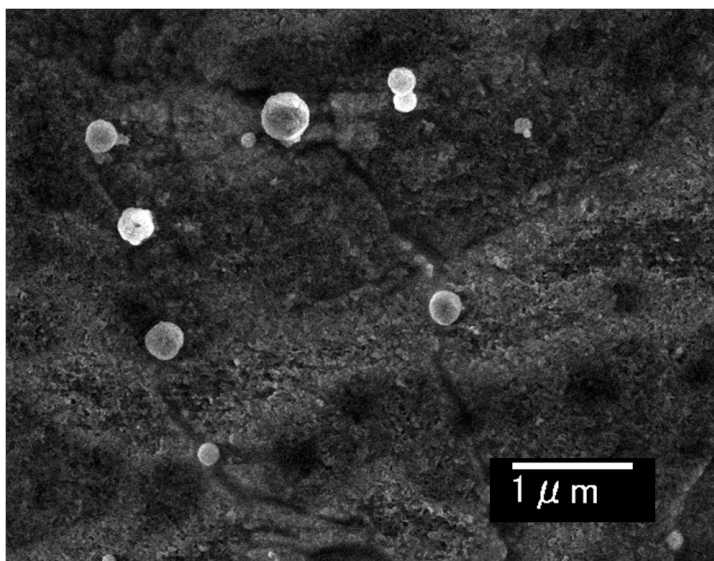

Figure S2. A SEM image of **RS2**<sub>SDS</sub>.

#### **Transmission electron microscopy (TEM)**

Samples for TEM observation were prepared as follows: 2-3 droplets of the nanocrystalline aqueous dispersions (**RS1**, **RS2**, **AS1-2**, and **AS2-1**) were dropped onto grids (200-mesh Cu, Nisshin EM) and dried under atmospheric pressure and *in vacuo*. TEM images were observed at 200 kV.

#### **Powder X-ray diffraction (XRD)**

Samples for powder XRD of bulk crystals of **1** and **2** were prepared by grinding the recrystallized crystals. Samples for powder XRD of **RS1**, **RS2**, and **AS2-1** were prepared as follows: 500 ml of the aqueous dispersions of **RS1** and **RS2** were filtered on milipore filters (OMNIPORE membrane filter with pore size of 0.1 μm). The powders were gathered on a reflection free sample holder. Figure S2-S5 show XRD patterns of bulk crystals and **RS1** and **RS2**.

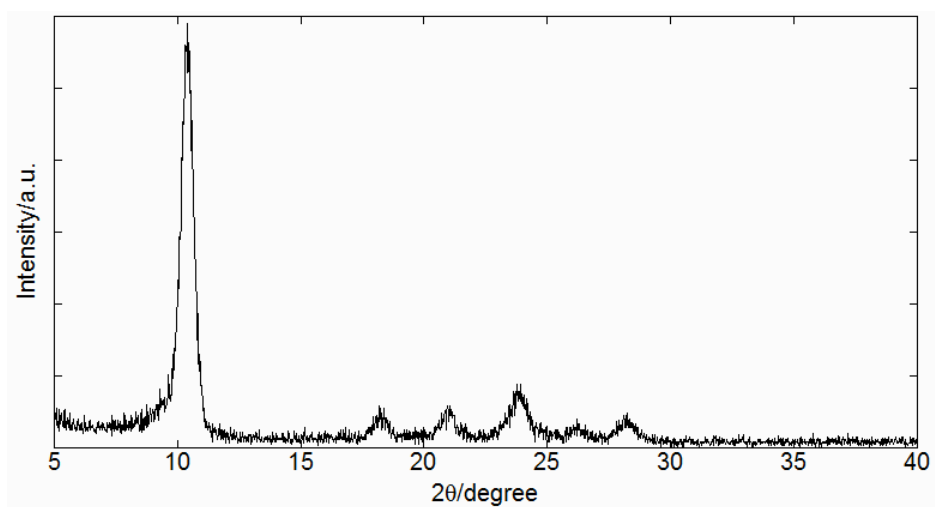

Figure S3. A powder XRD pattern of bulk crystals of **1**.

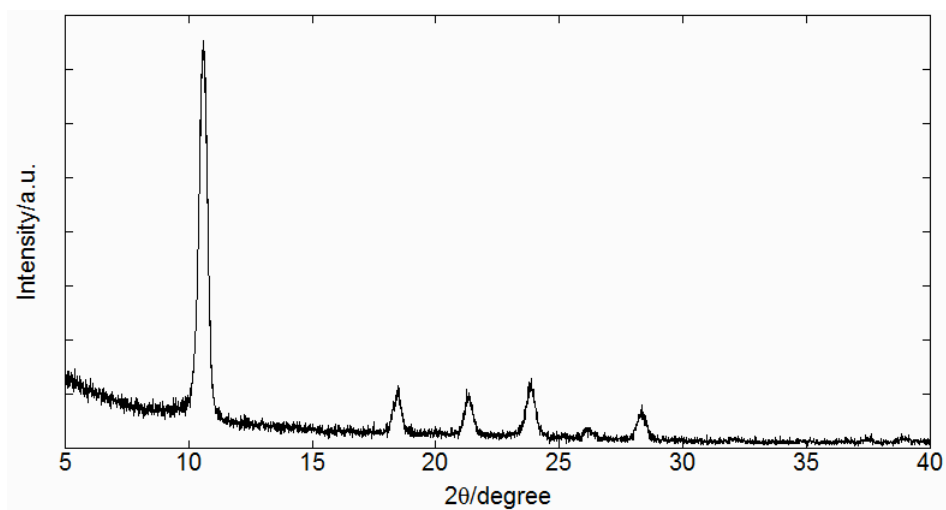

Figure S4. A powder XRD pattern of **RS1**.

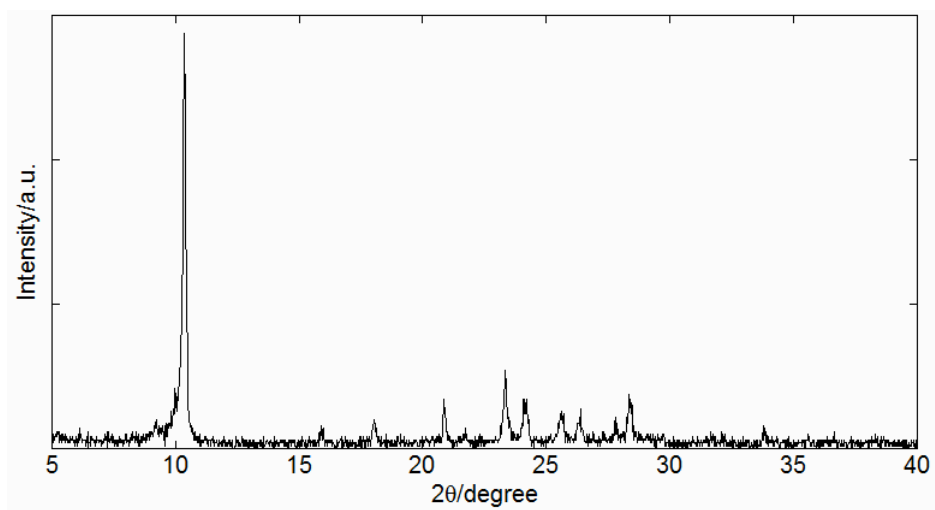

Figure S5. A powder XRD pattern of bulk crystals of **2**.

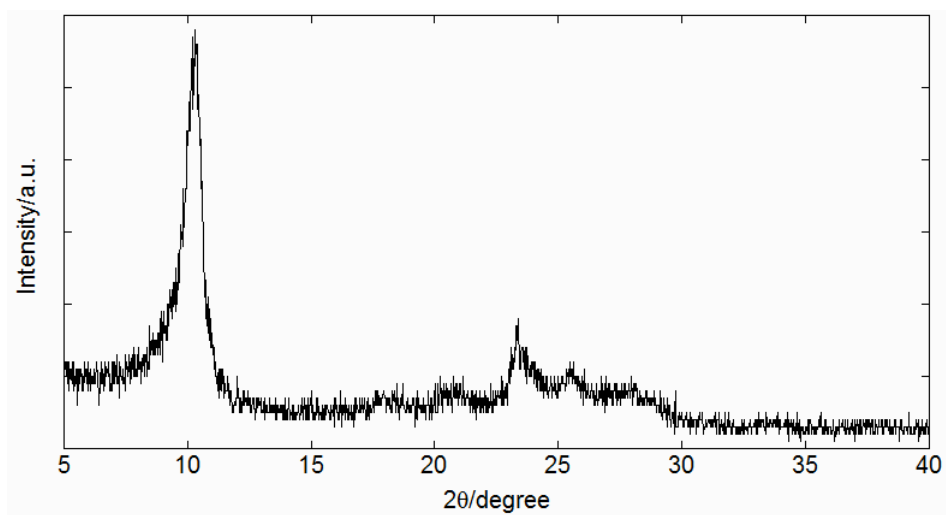

Figure S6. A powder XRD pattern of **RS2**.

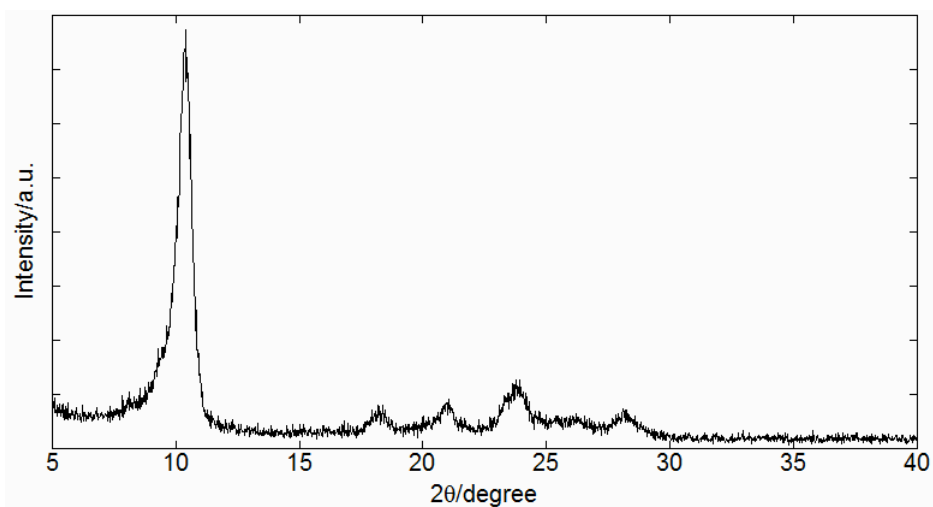

Figure S7. A powder XRD pattern of **AS2-1**.

#### UV-visible absorption and fluorescence spectra

Absorption and fluorescence spectra of the nanocrystalline aqueous dispersions (**RS1**, **RS2**, **RS2<sub>SDS</sub>**, **AS1-2**, and **AS2-1**) were observed by standard solution-phase spectroscopic methods.

Figure S6-S10 show absorption spectra of **RS1**, **RS2**, **RS2<sub>SDS</sub>**, **AS1-2**, and **AS2-1**.

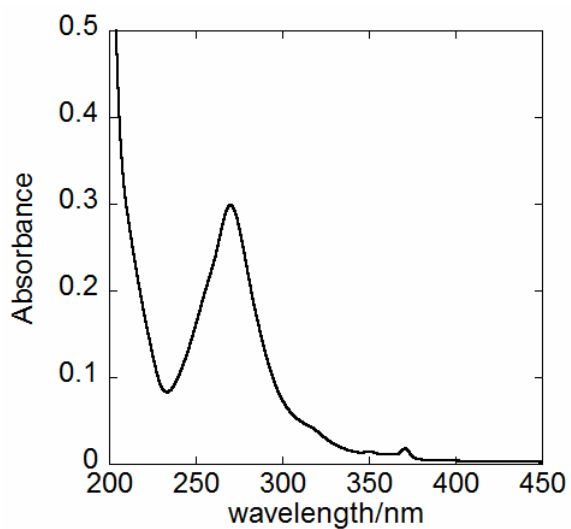

Figure S8. An UV absorption spectrum of **RS1**.

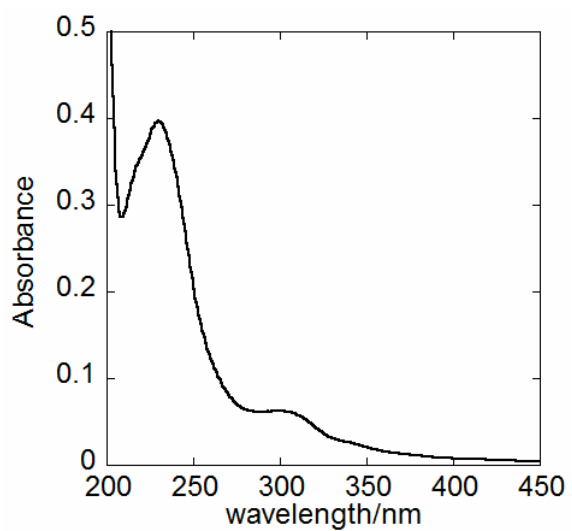

Figure S9. An UV absorption spectrum of **RS2**.

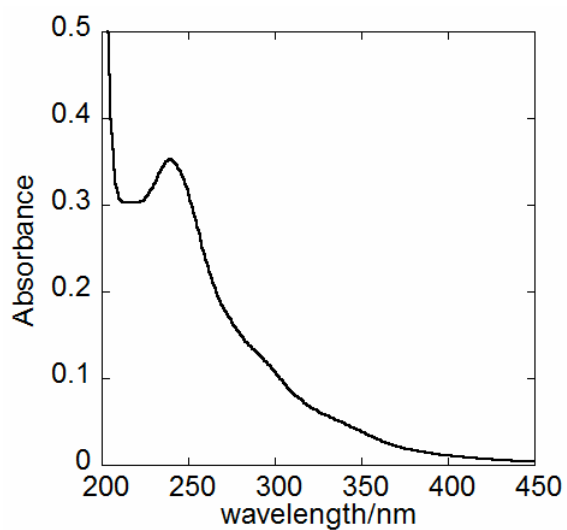

Figure S10. An UV absorption spectrum of **RS2<sub>SDS</sub>**.



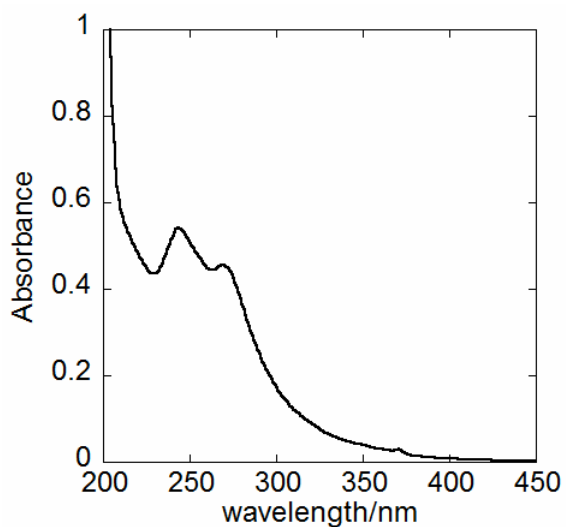

Figure S11. An UV absorption spectrum of **AS1-2**.

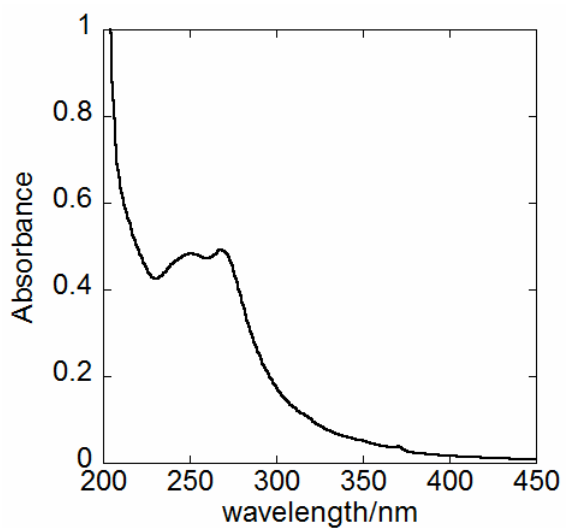

Figure S12. An UV absorption spectrum of **AS2-1**.

### Reference

- (1) H. Sakurai, T. Daiko, T. Hirao, *Science* 2003, **301**, 1878.
- (2) R. Tsuruoka, S. Higashibayashi, T. Ishikawa, S. Toyota, H. Sakurai, *Chem. Lett.* 2010, **39**, 646–647.
- (3) T. Amaya, M. Hifumi, M. Okada, Y. Shimizu, T. Moriuchi, K. Segawa, Y. Ando, T. Hirao, *J. Org. Chem.* 2011, **76**, 8049–8052.
